# Supplementary material for: A techno-economically feasible and sustainable C-lignin biorefinery
Source: Royal Society of Chemistry journal article supplement (doi:10.1039/d4gc06090c), 2025-01-01
Supplement: d4gc06090c1.pdf [file d4gc06090c1.pdf]

**Electronic Supporting Information (ESI)**  
**Techno-economic feasible and sustainable C-lignin**  
**biorefinery**

Pu Wang,<sup>a,c</sup> Shuizhong Wang,<sup>d</sup> Shihao Su,<sup>c</sup> Dexin Zhang,<sup>a,c</sup> Yuhe Liao,<sup>e</sup> Guoyong Song,<sup>d\*</sup> Lei Wang<sup>b,c\*</sup>

<sup>a</sup> College of Environmental and Resource Sciences, Zhejiang University, Hangzhou 310058, Zhejiang, China.

<sup>b</sup> Zhejiang Key Laboratory of Low-Carbon Intelligent Synthetic Biology, Westlake University, Hangzhou, Zhejiang 310030, China.

<sup>c</sup> Institute of Advanced Technology, Westlake Institute for Advanced Study, Hangzhou, Zhejiang 310024, China.

<sup>d</sup> Beijing Advanced Innovation Center for Tree Breeding by Molecular Design, Beijing Key Laboratory of Lignocellulosic Chemistry, Beijing Forestry University, Beijing 100083, China.

<sup>e</sup> Guangzhou Institute of Energy Conversion, Chinese Academy of Sciences, Guangzhou 510640, Guangdong, China.

Corresponding authors: [songg@bjfu.edu.cn](mailto:songg@bjfu.edu.cn), [wang\\_lei@westlake.edu.cn](mailto:wang_lei@westlake.edu.cn)

## List of abbreviations

|                                                            |                  |
|------------------------------------------------------------|------------------|
| • Aspen Capital Cost Estimator                             | ACCE             |
| • Capital Expenditure                                      | CAPEX            |
| • Chemical Engineering's Plant Cost Index                  | CEPCI            |
| • Combined Heat and Power                                  | CHP              |
| • Cash Flow Rate Of Return Analysis                        | DCFROR           |
| • Ozone formation-Terrestrial ecosystems                   | EOFP             |
| • Freshwater eutrophication                                | FEP              |
| • Freshwater ecotoxicity                                   | FETP             |
| • Fossil resource scarcity                                 | FFP              |
| • Global warming potential                                 | GWP              |
| • Higher heating value                                     | HHV              |
| • Ozone formation-Human health                             | HOFP             |
| • Human carcinogenic toxicity                              | HTPc             |
| • Human non-carcinogenic toxicity                          | HTPnc            |
| • Ionizing radiation                                       | IRP              |
| • Life cycle assessment                                    | LCA              |
| • Life cycle inventory                                     | LCI              |
| • Life cycle impact assessment                             | LCIA             |
| • Land use                                                 | LOP              |
| • Marine eutrophication                                    | MEP              |
| • Marine ecotoxicity                                       | METP             |
| • Minimum selling price                                    | MSP              |
| • National Renewable Energy Laboratory                     | NREL             |
| • Net present value                                        | NPV              |
| • Stratospheric ozone depletion                            | ODP              |
| • Operating expenses                                       | OPEX             |
| • Polyhydroxyalkanoates                                    | PHA              |
| • Fine particulate matter formation                        | PMFP             |
| • 4-(3-Hydroxypropyl)benzene-1,2-diol<br>(CAS: 46118-02-9) | Propanolcatechol |
| • 4-Propylcatechol (CAS: 2525-02-2)                        | Propylcatechol   |
| • Pressure swing adsorption                                | PSA              |
| • Reductive catalytic fractionation                        | RCF              |
| • Mineral resource scarcity                                | SOP              |
| • Terrestrial acidification                                | TAP              |
| • Tertbutyl catechol                                       | TBC              |
| • Techno-economic analysis                                 | TEA              |
| • Terrestrial ecotoxicity                                  | TETP             |
| • Total installed capital cost                             | TIC              |
| • Water consumption                                        | WCP              |

### **Determination of minimum selling price**

$$NPV = \sum_{t=1}^n \frac{C_t}{(1+r)^t} - C_0$$

Where r is discount rate,  $C_t$  is the net cash flow at time t,  $C_0$  is initial investment. The minimum selling price is determined by iteratively adjusting the selling cost of catechol until the net present value of the project reaches zero.

$C_t$  = Total annual sales (t) - Loan interest payment (t) - Total product cost (t) - Depreciation charge (t)

$C_0$  = Cumulative Investments + Interest

The calculation details are documented in Excel files.

## Process description and modelling details

Table S1 Full biomass compositions

| Castor seed coat definition | Reference                               |
|-----------------------------|-----------------------------------------|
| Cellulose                   | Native Aspen component (dextrose)       |
| hemicellulose               | Native Aspen component (d-xylose)       |
| Available C-lignin          | Native Aspen component (vanillin)       |
| Other components            | Native Aspen component (vanillin)       |
| Extractives                 | Native Aspen component (dextrose)       |
| ash                         | Native Aspen component CaO              |
| Moisture                    | Native Aspen component H <sub>2</sub> O |
| C-lignin intermediates      | Solubilized C-lignin and extractives    |

The pumps, compressors, heat exchangers and flash drums are modeled using the default models embedded in Aspen Plus® V12. RADFRAC model is chosen for distillation columns modeling. The pretreatment reactor in A100 is modeled using RStoic model. Hydrogenolysis reactor in A200 and dealkylation reactor in A400 are modeled using RYield reactor due to the complexity of reactions. <sup>1</sup>

Non-random two-liquid (NRTL) model is set as the default thermodynamic model for this simulation given the non-ideality of the components used in the simulation. Since the hydrogenolysis reaction occurs in a polar system and under high pressure (>10 bar), the PSRK EOS is selected as the property method for simulating the hydrogenolysis area (A200).

The thermodynamic and physical properties of pure component are retrieved from native aspen database or estimated using the National Institute of Science and Technology ThermoDataEngine (NIST-TDE) capabilities built into the Aspen Plus software. Binary interaction parameters were estimated using UNIFAC.

**Area 100 (A100): Pretreatment.** In this area, castor seed coats are extracted using methanol at a mass ratio of 1:4.4 (feedstock to methanol) and 70 °C under 1.3-1.5 bar. After pretreatment, the obtained slurry is filter separated and the liquid fraction is sent to A200 after the partial methanol recovery whilst the solid fraction is sold as the co-product pulp.

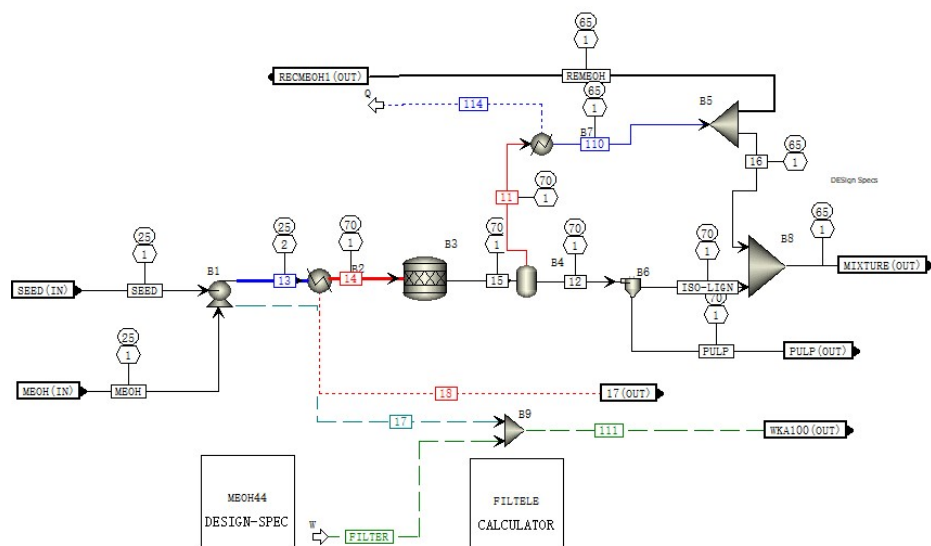

Fig. S1 Aspen Plus simulation flowchart for Pretreatment (A100) section

**Area 200 (A200): Catalytic Hydrogenolysis.** The reductive depolymerization occurs in a semi-continuous system using four parallel batch hydrogenation autoclaves, each operating in a staggered configuration. This allows three reactors to run simultaneously while one undergoes loading or unloading. The reductive depolymerization operated at the mass ratio of C-lignin intermediates to methanol of 0.23 and yield lignin oil consists of propanolcatechol, propylcatechol, and catechol oligomers and trace of methane generated via the hydrogenolysis of methanol.<sup>2</sup> Before heating the reactor to 200°C, the hydrogenolysis reactor is sealed, purged with nitrogen, and then pressurized with H<sub>2</sub> (3 MPa) in the presence of the 5 wt% Ru/C catalyst (catalyst to C-lignin sample). After the catalytic hydrogenolysis, the mixture stream is sent through a series of flash tanks to remove non-condensable vapors such as H<sub>2</sub>, CH<sub>4</sub>, CO<sub>2</sub>, CO and recover methanol by the vapor fraction condensation. The reaction slurry (unreacted solids) is cooled down to suppress chemical reaction, depressurized, and filtered by filter pressing. Pressure swing adsorption is capable of separating ultra-pure hydrogen (with a purity of over 99.99%) from various gas mixtures and has become one of the most widely applied hydrogen purification technologies globally.<sup>3</sup> In scenario analysis, the gaseous fraction is sent to PSA unit to recover unreacted H<sub>2</sub> and methanol for recycling back to the reactors. The efficiency of hydrogen recycling can reach 85%. After the hydrogenolysis, the obtained stream is centrifuged to separate unreacted solid from the C-lignin oil which is sent to A300.

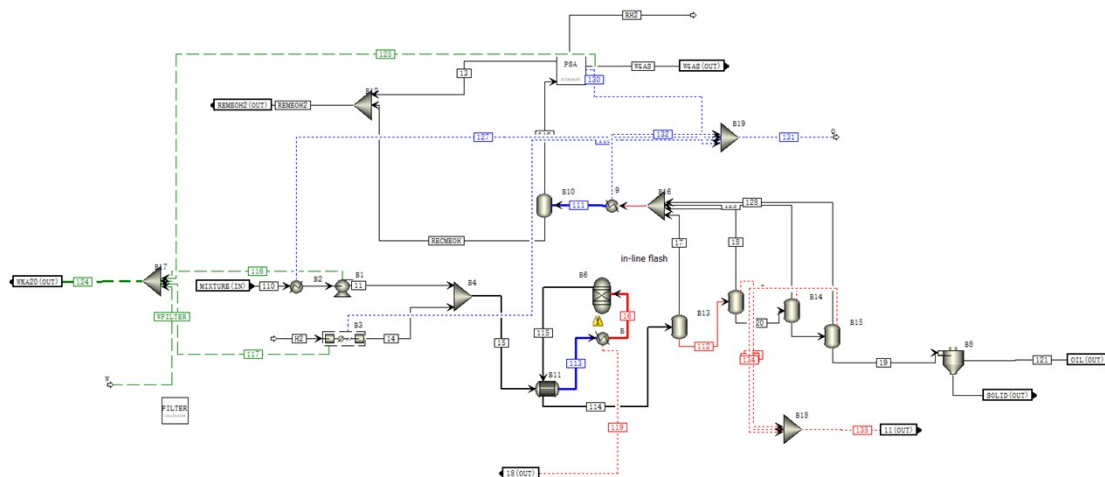

Fig. S2 Aspen Plus simulation flowchart for Catalytic hydrogenolysis (A200) section

**Area 300 (A300): Oligomers extraction.** Oligomers in the liquid stream from hydrogenolysis are obtained via the liquid-liquid extraction. The process is carried out using n-Hexane in an extraction column, 80 °C, with an n-hexane/lignin oil mass ratio of 3:1. The extraction efficiency is 60% (based on experimental data). After the extraction, n-hexane is separated and recovered using a plate distillation column. The monomer-rich fraction is then sent to Area 400 (A400) for dealkylation.

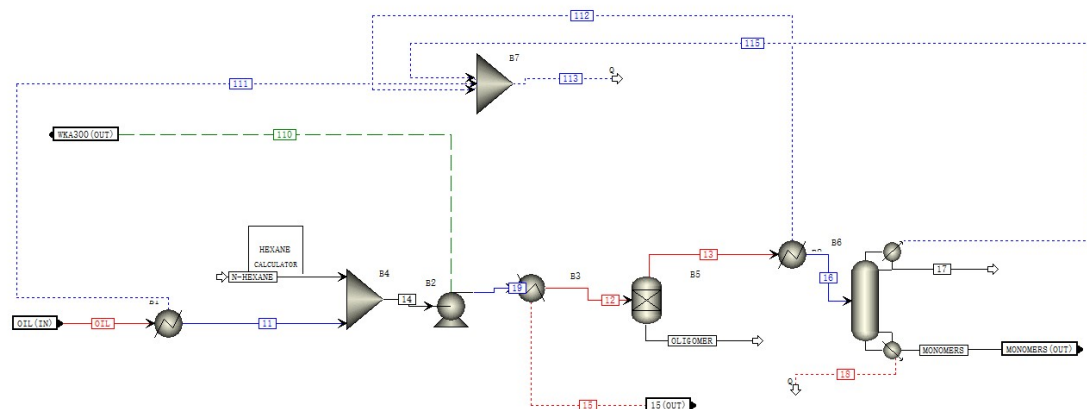

Fig. S3 Aspen Plus simulation flowchart for Oligomers extraction (A300) section

**Area 400 (A400): Dealkylation.** In this process, propylcatechol is converted to catechol via a gas-phase reaction conducted in a fixed-bed reactor under the atmospheric pressure at 400°C using ZSM-5-40 as the catalyst (weight hour space velocity (WHSV) = 4.2 h<sup>-1</sup>).<sup>4</sup> Catechol monomers from A300 are mixed with medium pressure steam (266 °C) from A600 before being fed to the dealkylation reactor which is further heated to 400°C using boiler flue gas from A600.

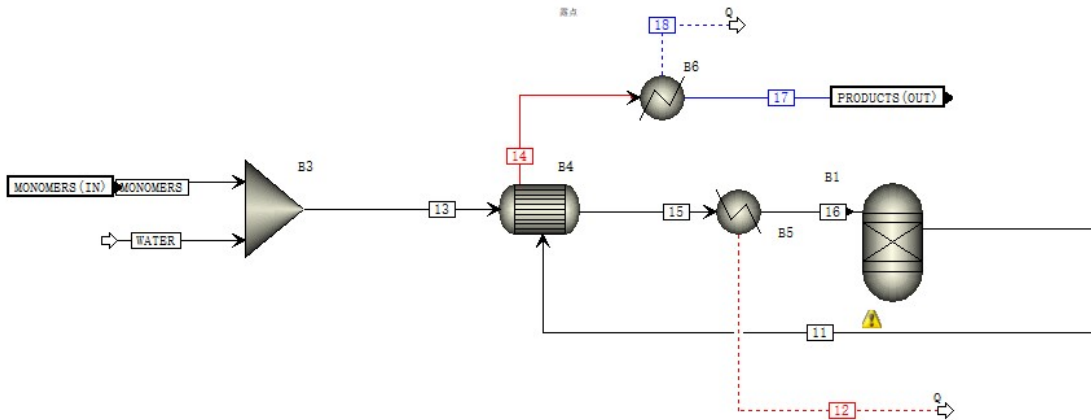

Fig. S4 Aspen Plus simulation flowchart for Dealkylation (A400) section

**Area 500 (A500): Separation.** The products from A400 are separated to the main product catechol, co-products propanolcatechol and propylene. Firstly the stream is sent to a condenser for quenching, separating product vapors from non-condensable gases ( $\text{CO}_2$  and propylene). The stream is then preheated and sent to flash evaporation to remove water, first plate distillation column to remove the remaining water, the resulted propanolcatechol and catechol were further separated by the second plate distillation column to yield products at high purity (99.9%).

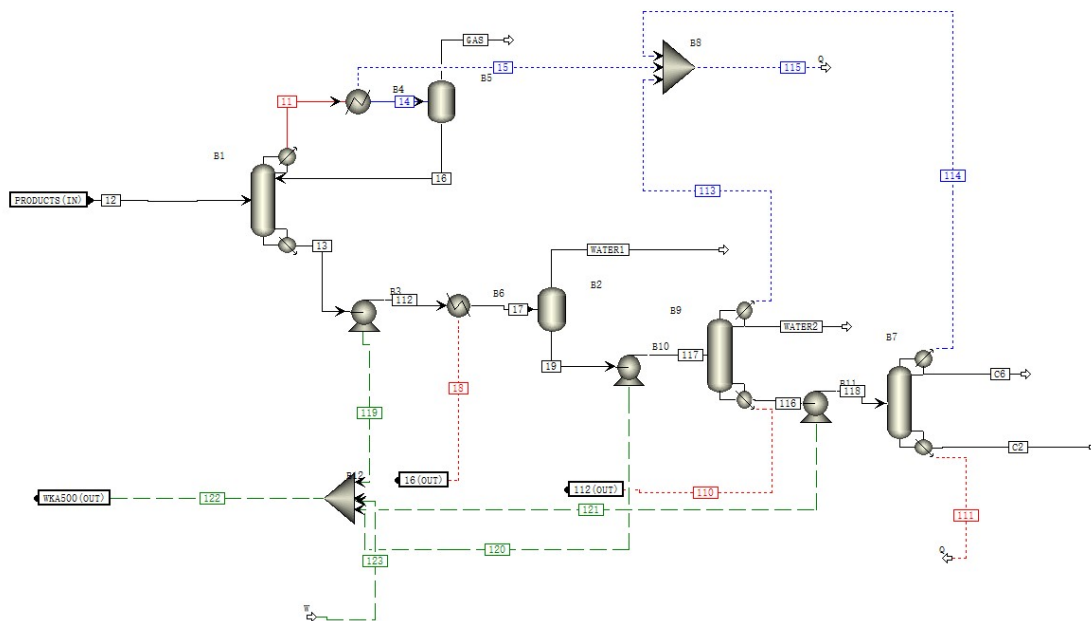

Fig. S5 Aspen Plus simulation flowchart for Separation (A500) section

**Area 600 (A600): Combined Heat and Power.** The CHP system design follows the U.S. NREL report which primarily consists of a burner, boiler, and turbine system. CHP system normally runs in two modes, either in the heat mode (following heat demand) or in the power mode (following power demand).<sup>5</sup> In this study, heat mode was chosen because the heat demand was significantly

higher, which is about 10 times that of electricity. Combustible wastes generated throughout the process including unreacted lignin and waste gases from the A200 are incinerated here to produce steam for thermal energy and electricity required by the plant, such as A100, A200, A300, A400 and A500. This unit primarily consists of a burner, boiler, and turbine system. The combustion is performed with 20% excess air to ensure the complete combustion. Boiler feedwater is sent into the heat exchanger to generate the superheated steam at 454°C and under 60 bar, with the overall efficiency around 80% (steam heat over combustible waste on energy basis). The superheated steam is fed into the turbine system for electricity generation and also is extracted for the use in A400 (13 bar), A100 and A500 (9.5 bar).

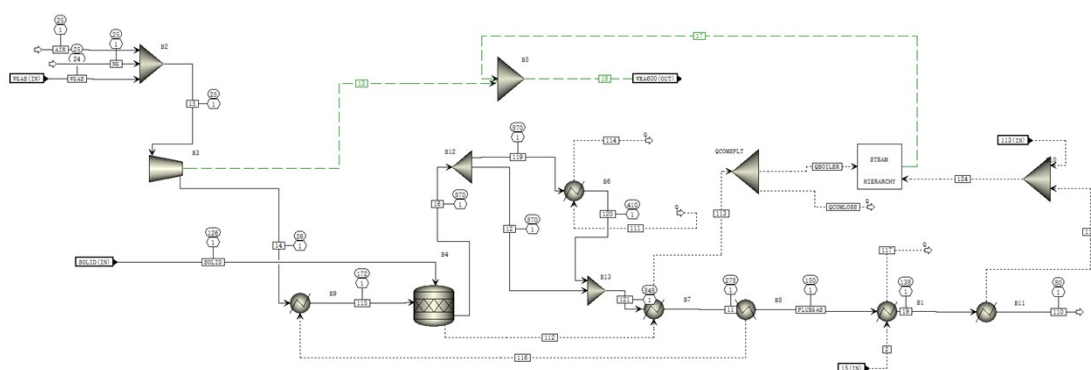

Fig. S6 Aspen Plus simulation flowchart for Cogeneration heat and power (A600) section

**Area 700 (A700): Storage.** This area is designated for the bulk storage of chemical materials and products in this process, including methanol, hydrogen, n-hexane, catechol (C6), propanolcatechol (C2), oligomers and propylene.

**Area 800 (A800): Cooling Water System.** This area provides cooling utilities including cooling water and chilled water for A100 to A600.



Table S2 Operating assumptions and mass balance for principal reaction areas

| Process area                     | condition                              | Input streams          | kg/h | Output streams         | kg/h |
|----------------------------------|----------------------------------------|------------------------|------|------------------------|------|
| A100<br>Pretreatment             | 70°C, 1.3-1.5 bar, S/L=1:4.4           | Castor seed coat (dry) | 1500 | C-lignin intermediates | 406  |
|                                  |                                        |                        |      | pulp                   | 1094 |
| A200<br>Catalytic hydrogenolysis | 200°C, 9~10 MPa, S/L=1:4.4             | C-lignin intermediates | 406  | C-lignin oil           | 127  |
|                                  |                                        |                        |      | Waste solids           | 266  |
|                                  |                                        |                        |      | Waste gas              | 13   |
| A300<br>Oligomers extraction     | 80°C, 1 atm, n-hexane/C-lignin oil=3:1 | C-lignin oil           | 127  | Oligomers              | 89   |
|                                  |                                        |                        |      | catechols              | 38   |
| A400<br>dealkylation             | 400 °C, 1 atm                          | catechols              | 38   | Catechol (C6)          | 16   |
|                                  |                                        |                        |      | Propylene              | 4    |
|                                  |                                        |                        |      | Propanolcatechol (C2)  | 9    |
|                                  |                                        |                        |      | CO <sub>2</sub>        | 9    |

**Fig. S7 Sensitivity analysis of scenario 3**

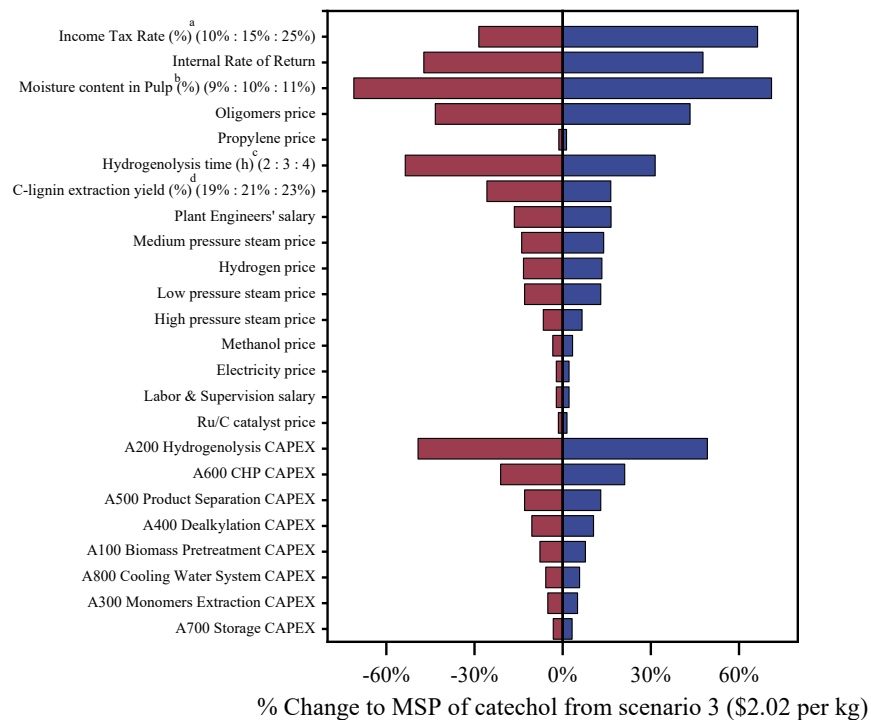

The local sensitivity analysis was carried out with one-at-a-time (OAT) approach. All variables are varied by 10% unless otherwise stated.

<sup>a</sup> 10%, 15% represent the tax rate of non-resident enterprises and hi-tech sectors mainly under the state support. 25% is the basic enterprise income tax rate in the current tax system.<sup>6</sup>

<sup>b</sup> This range reflects the range of moisture content of pulp.

<sup>c, d</sup> These ranges are based on our experimental experience.

**Fig. S8 Carbon efficiency of this process**

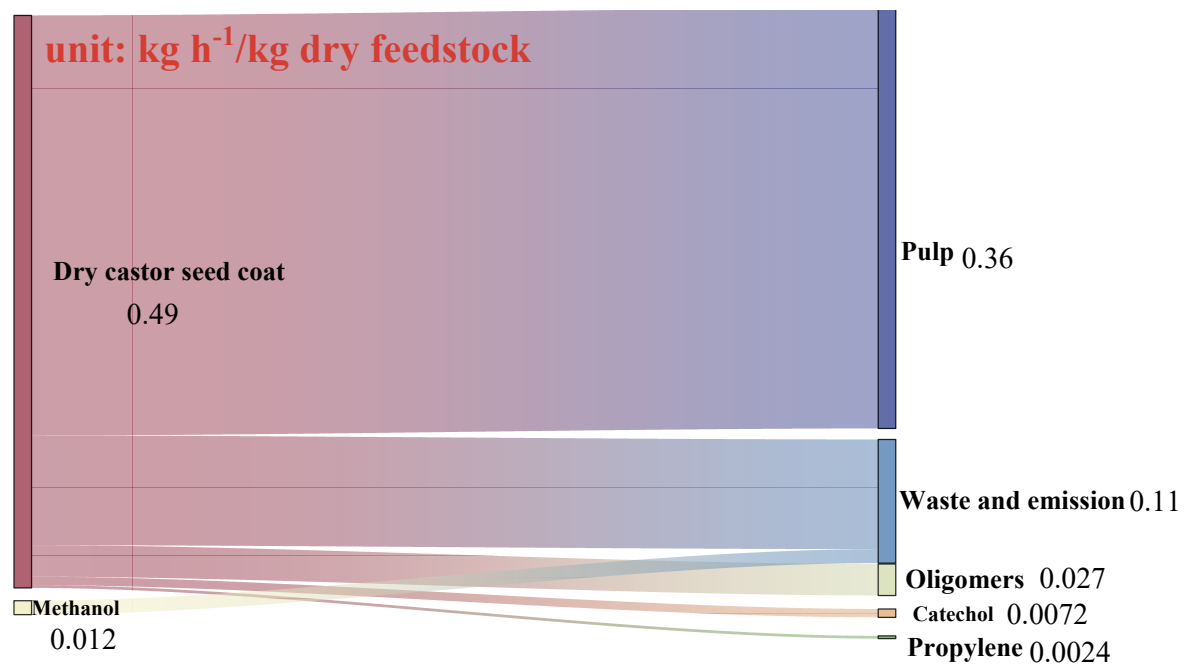

Table S3 full LCA results of fossil-based scenario

| Impact category | Unit                   | Total    |
|-----------------|------------------------|----------|
| Global warming  | kg CO <sub>2</sub> eq. | 5.72E+00 |

|                                         |                           |          |
|-----------------------------------------|---------------------------|----------|
| Stratospheric ozone depletion           | kg CFC11 eq.              | 1.47E-06 |
| Ionizing radiation                      | kBq Co-60 eq.             | 2.07E-01 |
| Ozone formation, Human health           | kg NOx eq.                | 1.21E-02 |
| Fine particulate matter formation       | kg PM2.5 eq.              | 8.81E-03 |
| Ozone formation, Terrestrial ecosystems | kg NOx eq.                | 1.33E-02 |
| Terrestrial acidification               | kg SO <sub>2</sub> eq.    | 1.72E-02 |
| Freshwater eutrophication               | kg P eq.                  | 1.87E-03 |
| Marine eutrophication                   | kg N eq.                  | 1.72E-04 |
| Terrestrial ecotoxicity                 | kg 1,4-DCB                | 1.31E+01 |
| Freshwater ecotoxicity                  | kg 1,4-DCB                | 1.73E-01 |
| Marine ecotoxicity                      | kg 1,4-DCB                | 2.38E-01 |
| Human carcinogenic toxicity             | kg 1,4-DCB                | 3.84E-01 |
| Human non-carcinogenic toxicity         | kg 1,4-DCB                | 4.56E+00 |
| Land use                                | m <sup>2</sup> a crop eq. | 6.82E-02 |
| Mineral resource scarcity               | kg Cu eq.                 | 1.09E-02 |
| Fossil resource scarcity                | kg oil eq.                | 2.76E+00 |
| Water consumption                       | m <sup>3</sup>            | 1.51E-01 |

Table S4 full LCA results of baseline scenario (S0)

| Impact category | Unit                   | Total    |
|-----------------|------------------------|----------|
| Global warming  | kg CO <sub>2</sub> eq. | 5.90E+00 |

|                                         |                           |          |
|-----------------------------------------|---------------------------|----------|
| Stratospheric ozone depletion           | kg CFC11 eq.              | 9.26E-06 |
| Ionizing radiation                      | kBq Co-60 eq.             | 5.51E-02 |
| Ozone formation, Human health           | kg NOx eq.                | 1.26E-02 |
| Fine particulate matter formation       | kg PM2.5 eq.              | 6.12E-03 |
| Ozone formation, Terrestrial ecosystems | kg NOx eq.                | 1.28E-02 |
| Terrestrial acidification               | kg SO <sub>2</sub> eq.    | 1.64E-02 |
| Freshwater eutrophication               | kg P eq.                  | 1.18E-03 |
| Marine eutrophication                   | kg N eq.                  | 3.41E-03 |
| Terrestrial ecotoxicity                 | kg 1,4-DCB                | 2.60E+00 |
| Freshwater ecotoxicity                  | kg 1,4-DCB                | 7.69E-02 |
| Marine ecotoxicity                      | kg 1,4-DCB                | 1.05E-01 |
| Human carcinogenic toxicity             | kg 1,4-DCB                | 1.05E-01 |
| Human non-carcinogenic toxicity         | kg 1,4-DCB                | 5.17E+00 |
| Land use                                | m <sup>2</sup> a crop eq. | 3.99E-02 |
| Mineral resource scarcity               | kg Cu eq.                 | 9.82E-03 |
| Fossil resource scarcity                | kg oil eq.                | 2.20E+00 |
| Water consumption                       | m <sup>3</sup>            | 1.47E-01 |

Table S5 full LCA results of scenario 1 (S1)

| Impact category | Unit                   | Total    |
|-----------------|------------------------|----------|
| Global warming  | kg CO <sub>2</sub> eq. | 2.83E+00 |

|                                         |                           |          |
|-----------------------------------------|---------------------------|----------|
| Stratospheric ozone depletion           | kg CFC11 eq.              | 1.17E-06 |
| Ionizing radiation                      | kBq Co-60 eq.             | 9.56E-03 |
| Ozone formation, Human health           | kg NOx eq.                | 4.65E-03 |
| Fine particulate matter formation       | kg PM2.5 eq.              | 1.66E-03 |
| Ozone formation, Terrestrial ecosystems | kg NOx eq.                | 4.89E-03 |
| Terrestrial acidification               | kg SO <sub>2</sub> eq.    | 4.92E-03 |
| Freshwater eutrophication               | kg P eq.                  | 1.91E-04 |
| Marine eutrophication                   | kg N eq.                  | 1.07E-05 |
| Terrestrial ecotoxicity                 | kg 1,4-DCB                | 5.15E-01 |
| Freshwater ecotoxicity                  | kg 1,4-DCB                | 2.78E-02 |
| Marine ecotoxicity                      | kg 1,4-DCB                | 3.97E-02 |
| Human carcinogenic toxicity             | kg 1,4-DCB                | 2.12E-02 |
| Human non-carcinogenic toxicity         | kg 1,4-DCB                | 9.07E-01 |
| Land use                                | m <sup>2</sup> a crop eq. | 3.60E-03 |
| Mineral resource scarcity               | kg Cu eq.                 | 8.30E-03 |
| Fossil resource scarcity                | kg oil eq.                | 1.83E+00 |
| Water consumption                       | m <sup>3</sup>            | 1.47E-01 |

Table S6 full LCA results of scenario 2 (S2)

| Impact category | Unit | Total |
|-----------------|------|-------|
|-----------------|------|-------|

|                                         |                           |          |
|-----------------------------------------|---------------------------|----------|
| Global warming                          | kg CO <sub>2</sub> eq.    | 3.18E+00 |
| Stratospheric ozone depletion           | kg CFC11 eq.              | 1.26E-06 |
| Ionizing radiation                      | kBq Co-60 eq.             | 1.06E-02 |
| Ozone formation, Human health           | kg NO <sub>x</sub> eq.    | 5.23E-03 |
| Fine particulate matter formation       | kg PM <sub>2.5</sub> eq.  | 1.87E-03 |
| Ozone formation, Terrestrial ecosystems | kg NO <sub>x</sub> eq.    | 5.48E-03 |
| Terrestrial acidification               | kg SO <sub>2</sub> eq.    | 5.41E-03 |
| Freshwater eutrophication               | kg P eq.                  | 1.97E-04 |
| Marine eutrophication                   | kg N eq.                  | 1.19E-05 |
| Terrestrial ecotoxicity                 | kg 1,4-DCB                | 5.28E-01 |
| Freshwater ecotoxicity                  | kg 1,4-DCB                | 2.81E-02 |
| Marine ecotoxicity                      | kg 1,4-DCB                | 4.03E-02 |
| Human carcinogenic toxicity             | kg 1,4-DCB                | 2.26E-02 |
| Human non-carcinogenic toxicity         | kg 1,4-DCB                | 9.04E-01 |
| Land use                                | m <sup>2</sup> a crop eq. | 4.16E-03 |
| Mineral resource scarcity               | kg Cu eq.                 | 8.37E-03 |
| Fossil resource scarcity                | kg oil eq.                | 2.00E+00 |
| Water consumption                       | m <sup>3</sup>            | 1.44E-01 |

Table S7 full LCA results of scenario 3 (S3)

| Impact category | Unit | Total |
|-----------------|------|-------|
|-----------------|------|-------|

|                                         |                           |          |
|-----------------------------------------|---------------------------|----------|
| Global warming                          | kg CO <sub>2</sub> eq.    | 1.58E+00 |
| Stratospheric ozone depletion           | kg CFC11 eq.              | 1.33E-06 |
| Ionizing radiation                      | kBq Co-60 eq.             | 2.32E-02 |
| Ozone formation, Human health           | kg NO <sub>x</sub> eq.    | 6.11E-03 |
| Fine particulate matter formation       | kg PM <sub>2.5</sub> eq.  | 2.73E-03 |
| Ozone formation, Terrestrial ecosystems | kg NO <sub>x</sub> eq.    | 6.28E-03 |
| Terrestrial acidification               | kg SO <sub>2</sub> eq.    | 7.20E-03 |
| Freshwater eutrophication               | kg P eq.                  | 3.77E-04 |
| Marine eutrophication                   | kg N eq.                  | 2.01E-05 |
| Terrestrial ecotoxicity                 | kg 1,4-DCB                | 1.15E+00 |
| Freshwater ecotoxicity                  | kg 1,4-DCB                | 3.95E-02 |
| Marine ecotoxicity                      | kg 1,4-DCB                | 5.47E-02 |
| Human carcinogenic toxicity             | kg 1,4-DCB                | 4.77E-02 |
| Human non-carcinogenic toxicity         | kg 1,4-DCB                | 1.11E+00 |
| Land use                                | m <sup>2</sup> a crop eq. | 1.65E-02 |
| Mineral resource scarcity               | kg Cu eq.                 | 8.37E-03 |
| Fossil resource scarcity                | kg oil eq.                | 1.24E+00 |
| Water consumption                       | m <sup>3</sup>            | 1.46E-01 |

Table S8 full LCA results of scenario 4 (S4)

| Impact category | Unit | Total |
|-----------------|------|-------|
|-----------------|------|-------|



|                                         |                           |          |
|-----------------------------------------|---------------------------|----------|
| Global warming                          | kg CO <sub>2</sub> eq.    | 1.05E+00 |
| Stratospheric ozone depletion           | kg CFC11 eq.              | 1.92E-06 |
| Ionizing radiation                      | kBq Co-60 eq.             | 2.20E-02 |
| Ozone formation, Human health           | kg NOx eq.                | 6.07E-03 |
| Fine particulate matter formation       | kg PM2.5 eq.              | 2.51E-03 |
| Ozone formation, Terrestrial ecosystems | kg NOx eq.                | 6.22E-03 |
| Terrestrial acidification               | kg SO <sub>2</sub> eq.    | 6.56E-03 |
| Freshwater eutrophication               | kg P eq.                  | 3.61E-04 |
| Marine eutrophication                   | kg N eq.                  | 1.93E-05 |
| Terrestrial ecotoxicity                 | kg 1,4-DCB                | 9.43E-01 |
| Freshwater ecotoxicity                  | kg 1,4-DCB                | 3.74E-02 |
| Marine ecotoxicity                      | kg 1,4-DCB                | 5.21E-02 |
| Human carcinogenic toxicity             | kg 1,4-DCB                | 4.41E-02 |
| Human non-carcinogenic toxicity         | kg 1,4-DCB                | 1.04E+00 |
| Land use                                | m <sup>2</sup> a crop eq. | 1.53E-02 |
| Mineral resource scarcity               | kg Cu eq.                 | 7.93E-03 |
| Fossil resource scarcity                | kg oil eq.                | 9.57E-01 |
| Water consumption                       | m <sup>3</sup>            | 1.45E-01 |

Table S9 full LCA results of scenario 5 (S5)

| Impact category | Unit | Total |
|-----------------|------|-------|
|-----------------|------|-------|

|                                         |                           |          |
|-----------------------------------------|---------------------------|----------|
| Global warming                          | kg CO <sub>2</sub> eq.    | 1.94E-01 |
| Stratospheric ozone depletion           | kg CFC11 eq.              | 7.90E-06 |
| Ionizing radiation                      | kBq Co-60 eq.             | 2.61E-02 |
| Ozone formation, Human health           | kg NOx eq.                | 4.64E-03 |
| Fine particulate matter formation       | kg PM2.5 eq.              | 1.45E-02 |
| Ozone formation, Terrestrial ecosystems | kg NOx eq.                | 4.71E-03 |
| Terrestrial acidification               | kg SO <sub>2</sub> eq.    | 1.04E-01 |
| Freshwater eutrophication               | kg P eq.                  | 4.27E-04 |
| Marine eutrophication                   | kg N eq.                  | 2.19E-05 |
| Terrestrial ecotoxicity                 | kg 1,4-DCB                | 1.16E+00 |
| Freshwater ecotoxicity                  | kg 1,4-DCB                | 4.04E-02 |
| Marine ecotoxicity                      | kg 1,4-DCB                | 5.57E-02 |
| Human carcinogenic toxicity             | kg 1,4-DCB                | 4.66E-02 |
| Human non-carcinogenic toxicity         | kg 1,4-DCB                | 1.12E+00 |
| Land use                                | m <sup>2</sup> a crop eq. | 2.86E-02 |
| Mineral resource scarcity               | kg Cu eq.                 | 8.14E-03 |
| Fossil resource scarcity                | kg oil eq.                | 4.46E-01 |
| Water consumption                       | m <sup>3</sup>            | 1.45E-01 |

Table S10 full LCA results of scenario 6 (S6)

| Impact category | Unit | Total |
|-----------------|------|-------|
|-----------------|------|-------|

|                                         |                           |          |
|-----------------------------------------|---------------------------|----------|
| Global warming                          | kg CO <sub>2</sub> eq.    | 1.92E-01 |
| Stratospheric ozone depletion           | kg CFC11 eq.              | 7.90E-06 |
| Ionizing radiation                      | kBq Co-60 eq.             | 3.10E-02 |
| Ozone formation, Human health           | kg NO <sub>x</sub> eq.    | 4.78E-03 |
| Fine particulate matter formation       | kg PM <sub>2.5</sub> eq.  | 1.46E-02 |
| Ozone formation, Terrestrial ecosystems | kg NO <sub>x</sub> eq.    | 4.86E-03 |
| Terrestrial acidification               | kg SO <sub>2</sub> eq.    | 1.04E-01 |
| Freshwater eutrophication               | kg P eq.                  | 4.54E-04 |
| Marine eutrophication                   | kg N eq.                  | 2.73E-05 |
| Terrestrial ecotoxicity                 | kg 1,4-DCB                | 1.31E+00 |
| Freshwater ecotoxicity                  | kg 1,4-DCB                | 4.23E-02 |
| Marine ecotoxicity                      | kg 1,4-DCB                | 5.84E-02 |
| Human carcinogenic toxicity             | kg 1,4-DCB                | 4.97E-02 |
| Human non-carcinogenic toxicity         | kg 1,4-DCB                | 1.25E+00 |
| Land use                                | m <sup>2</sup> a crop eq. | 2.90E-01 |
| Mineral resource scarcity               | kg Cu eq.                 | 8.28E-03 |
| Fossil resource scarcity                | kg oil eq.                | 3.86E-01 |
| Water consumption                       | m <sup>3</sup>            | 1.46E-01 |

Table S11 full LCA results of scenario 7 (S7)

| Impact category                         | Unit                      | Total     |
|-----------------------------------------|---------------------------|-----------|
| Global warming                          | kg CO <sub>2</sub> eq.    | -7.03E-01 |
| Stratospheric ozone depletion           | kg CFC11 eq.              | 7.99E-06  |
| Ionizing radiation                      | kBq Co-60 eq.             | 1.75E-02  |
| Ozone formation, Human health           | kg NO <sub>x</sub> eq.    | 2.27E-03  |
| Fine particulate matter formation       | kg PM <sub>2.5</sub> eq.  | 1.32E-02  |
| Ozone formation, Terrestrial ecosystems | kg NO <sub>x</sub> eq.    | 2.35E-03  |
| Terrestrial acidification               | kg SO <sub>2</sub> eq.    | 1.01E-01  |
| Freshwater eutrophication               | kg P eq.                  | 2.92E-04  |
| Marine eutrophication                   | kg N eq.                  | 2.67E-05  |
| Terrestrial ecotoxicity                 | kg 1,4-DCB                | 9.10E-01  |
| Freshwater ecotoxicity                  | kg 1,4-DCB                | 3.33E-02  |
| Marine ecotoxicity                      | kg 1,4-DCB                | 4.60E-02  |
| Human carcinogenic toxicity             | kg 1,4-DCB                | 2.75E-02  |
| Human non-carcinogenic toxicity         | kg 1,4-DCB                | 1.08E+00  |
| Land use                                | m <sup>2</sup> a crop eq. | 2.84E-01  |
| Mineral resource scarcity               | kg Cu eq.                 | 8.41E-03  |
| Fossil resource scarcity                | kg oil eq.                | 2.16E-01  |
| Water consumption                       | m <sup>3</sup>            | 1.44E-01  |

Table S12 full LCA results of scenario 8 (S8)

| Impact category                         | Unit                      | Total     |
|-----------------------------------------|---------------------------|-----------|
| Global warming                          | kg CO <sub>2</sub> eq.    | -1.32E+00 |
| Stratospheric ozone depletion           | kg CFC11 eq.              | 7.81E-06  |
| Ionizing radiation                      | kBq Co-60 eq.             | -2.66E-02 |
| Ozone formation, Human health           | kg NO <sub>x</sub> eq.    | 1.15E-03  |
| Fine particulate matter formation       | kg PM <sub>2.5</sub> eq.  | 1.21E-02  |
| Ozone formation, Terrestrial ecosystems | kg NO <sub>x</sub> eq.    | 1.22E-03  |
| Terrestrial acidification               | kg SO <sub>2</sub> eq.    | 9.93E-02  |
| Freshwater eutrophication               | kg P eq.                  | 2.02E-04  |
| Marine eutrophication                   | kg N eq.                  | 2.11E-05  |
| Terrestrial ecotoxicity                 | kg 1,4-DCB                | 4.48E+00  |
| Freshwater ecotoxicity                  | kg 1,4-DCB                | 2.41E-01  |
| Marine ecotoxicity                      | kg 1,4-DCB                | 3.00E-01  |
| Human carcinogenic toxicity             | kg 1,4-DCB                | 3.67E-02  |
| Human non-carcinogenic toxicity         | kg 1,4-DCB                | 2.00E+00  |
| Land use                                | m <sup>2</sup> a crop eq. | 2.83E-01  |
| Mineral resource scarcity               | kg Cu eq.                 | 1.26E-02  |
| Fossil resource scarcity                | kg oil eq.                | -7.83E-03 |
| Water consumption                       | m <sup>3</sup>            | 1.30E-01  |

Table S13 Emission factors of natural gas combustion for stationary applications (grams per mmBtu of fuel burned).<sup>7</sup>

|                  | small industrial boiler | small turbine |
|------------------|-------------------------|---------------|
| VOC              | 2.54E+00                | 1.06E+00      |
| CO               | 2.50E+01                | 4.13E+01      |
| NOx              | 4.11E+01                | 3.20E+01      |
| PM10             | 3.51E+00                | 3.58E+00      |
| PM2.5            | 3.51E+00                | 3.58E+00      |
| SOx              | 2.69E-01                | 2.69E-01      |
| BC               | 5.79E-01                | 1.04E-01      |
| OC               | 1.50E+00                | 2.43E+00      |
| CH <sub>4</sub>  | 1.06E+00                | 1.06E+00      |
| N <sub>2</sub> O | 3.50E-01                | 1.02E-01      |
| CO <sub>2</sub>  | 5.94E+04                | 5.93E+04      |

Table S14 Life cycle inventory for production of 1 kg 5% Ru/C catalyst. <sup>8</sup>

| <b>Inputs from nature</b> | <b>Total amount</b> | <b>Allocated amount</b> | <b>Unit</b> |
|---------------------------|---------------------|-------------------------|-------------|
|---------------------------|---------------------|-------------------------|-------------|

|                                                                                                                            |                     |                         |             |
|----------------------------------------------------------------------------------------------------------------------------|---------------------|-------------------------|-------------|
| Water, process, unspecified natural origin/m <sup>3</sup>                                                                  | 5.85E-03            | 5.85E-03                | kg          |
| <b>Materials/fuels</b>                                                                                                     | <b>Total amount</b> | <b>Allocated amount</b> | <b>Unit</b> |
| Activated carbon, granular {GLO}  market for activated carbon, granular   Cut-off, U                                       | 9.42E-01            | 9.42E-01                | kg          |
| Water, deionised, from tap water, at user <sup>3</sup>   market for water, deionised, from tap water, at user   Cut-off, U | 9.45E-01            | 9.45E-01                | kg          |
| Nitrogen, liquid {RER}  market for   Cut-off, U                                                                            | 2.59E-03            | 2.59E-03                | kg          |
| Ru                                                                                                                         | 2.85E-02            | 2.85E-02                | kg          |
| Chlorine, gaseous {RER}  market for   Cut-off, U                                                                           | 2.97E-02            | 2.97E-02                | kg          |
| <b>Electricity/heat</b>                                                                                                    | <b>Total amount</b> | <b>Allocated amount</b> | <b>Unit</b> |
| Heat, district or industrial, natural gas {RoW}  heat production, natural gas, at industrial furnace >100kW   Cut-off, U   | 3.12E+02            | 3.12E+02                | MJ          |
| Heat, from steam, in chemical industry {RER}  market for heat, from steam, in chemical industry   Cut-off, U               | 2.52E+00            | 2.52E+00                | MJ          |
| Electricity, medium voltage {CN}  market group for   Cut-off, U                                                            | 8.73E+01            | 8.73E+01                | kJ          |
| Table S15 Life cycle inventory for production of 1 kg green hydrogen. <sup>9</sup>                                         |                     |                         |             |
| <b>Avoided products</b>                                                                                                    | <b>Total amount</b> | <b>Allocated amount</b> | <b>Unit</b> |

|                                                                                                     |                     |                         |             |
|-----------------------------------------------------------------------------------------------------|---------------------|-------------------------|-------------|
| Oxygen, liquid {RoW}  market for   Cut-off, U                                                       | 8                   | 8                       | kg          |
| <b>Inputs from nature</b>                                                                           | <b>Total amount</b> | <b>Allocated amount</b> | <b>Unit</b> |
| Water, salt, ocean                                                                                  | 9                   | 9                       | kg          |
| <b>Materials/fuels</b>                                                                              | <b>Total amount</b> | <b>Allocated amount</b> | <b>Unit</b> |
| Activated carbon, granular {GLO}  market for activated carbon, granular   Cut-off, U                | 9.94E-6             |                         | kg          |
| Reinforcing steel {GLO}  market for   Cut-off, U                                                    | 1.11E-04            |                         | kg          |
| Polyvinylfluoride, film {GLO}  market for   Cut-off, U                                              | 1.76E-5             |                         | kg          |
| Copper {GLO}  market for   Cut-off, U                                                               | 4.97E-6             |                         | kg          |
| Platinum {GLO}  market for   Cut-off, U                                                             | 8.0E-8              |                         | kg          |
| Titanium, primary {GLO}  market for   Cut-off, U                                                    | 5.83E-04            |                         | kg          |
| Aluminium, primary, ingot {RoW}  market for   Cut-off, U                                            | 2.98E-5             |                         | kg          |
| <b>Electricity/heat</b>                                                                             | <b>Total amount</b> | <b>Allocated amount</b> | <b>Unit</b> |
| Electricity, high voltage {CN-HB}  electricity production, wind, >3MW turbine, onshore   Cut-off, U | 49.02               | 49.02                   | kWh         |



Fig S9 Full LCA analysis results of S3-S5

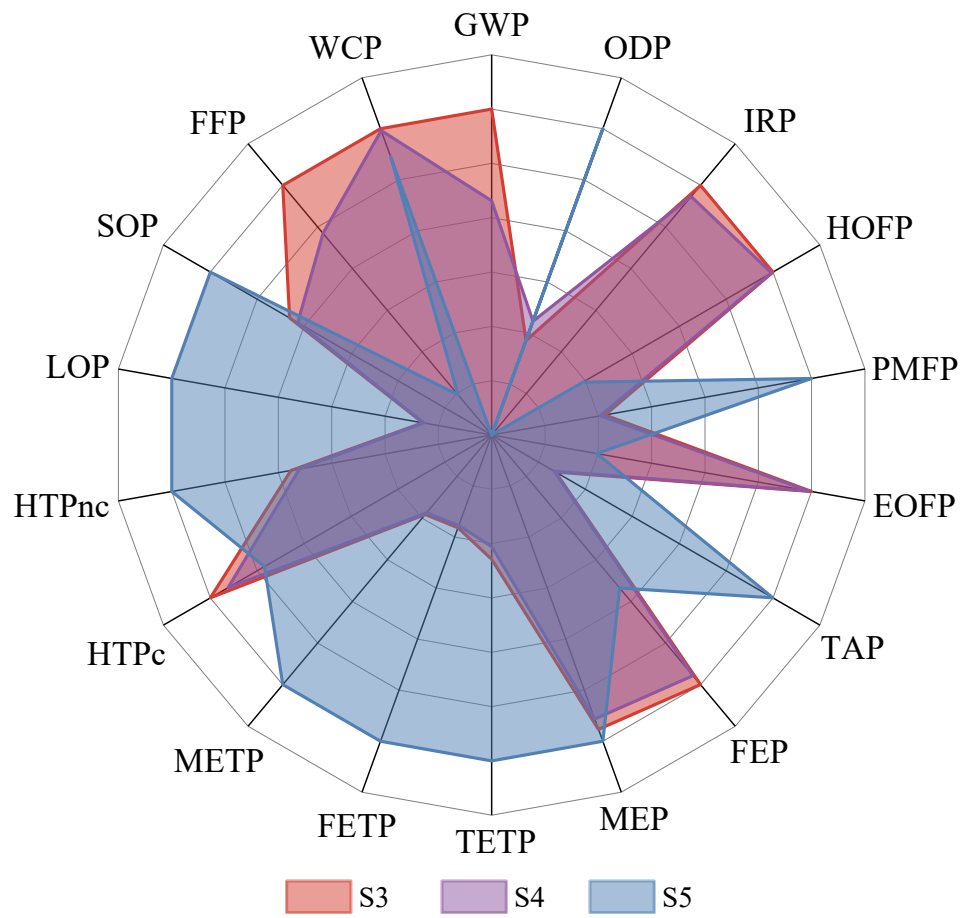

## References

1. S. Yu, X. Dong, P. Zhao, Z. Luo, Z. Sun, X. Yang, Q. Li, L. Wang, Y. Zhang and H. Zhou, *Nat. Commun.*, 2022, **13**, 3616.
2. N. M. Sackers, J. Nikodemus, R. Palkovits, P. Sautet and P. J. C. Hausoul, *ChemCatChem*, 2023, **15**, e202201530.
3. M. Luberti and H. Ahn, *Int. J. Hydrogen Energy*, 2022, **47**, 10911-10933.
4. X. Wu, Y. Liao, J. Bomon, G. Tian, S.-T. Bai, K. Van Aelst, Q. Zhang, W. Vermandel, B. Wambacq, B. U. W. Maes, J. Yu and B. F. Sels, *ChemSusChem*, 2022, **15**, e202102248.
5. A. Pääkkönen and T. Joronen, *Energy Convers. Manage.*, 2019, **188**, 66-75.
6. Table of enterprise income tax rates (2023), <https://www.shui5.cn/article/e7/70507.html>.
7. GREET, <https://greet.es.anl.gov/>.
8. L. J. Snowden-Swan, K. A. Spies, G. J. Lee and Y. Zhu, *Biomass Bioenerg.*, 2016, **86**, 136-145.
9. J. Zhang, Z. Wang, Y. He, M. Li, X. Wang, B. Wang, Y. Zhu and K. Cen, *Sustain. Energy Techn.*, 2023, **60**, 103515.
